# Supplementary material for: Efficacy and Safety of Colistin versus Tigecycline for Multi-Drug-Resistant and Extensively Drug-Resistant Gram-Negative Pathogens—A Meta-Analysis
Source: MDPI journal article supplement (doi:10.3390/antibiotics11111630), 2022-11-15

**Table S1: Methodological quality of the included cohort observational studies based on the New Castle Ottawa scale for assessing the quality of epidemiological studies.**

| Study                              | <u>Selection</u>                         |                                     |                                        |                                                        | <u>Comparability</u>                           | <u>Outcome</u>        |                       |                                              | Total Score |
|------------------------------------|------------------------------------------|-------------------------------------|----------------------------------------|--------------------------------------------------------|------------------------------------------------|-----------------------|-----------------------|----------------------------------------------|-------------|
|                                    | Representativeness of the exposed cohort | Selection of the non-exposed cohort | Ascertainment of exposure <sup>1</sup> | Outcome was not present at start of study <sup>2</sup> | Control for 2 important factors <sup>3,4</sup> | Assessment of outcome | Follow-up long enough | Adequacy of follow-up of cohort <sup>7</sup> |             |
| Oliveira et al 2020                | *                                        | *                                   | *                                      | -                                                      | *                                              | *                     | *                     | *                                            | 7           |
| Chusri et al 2019                  | *                                        | *                                   | *                                      | -                                                      | *                                              | *                     | *                     | *                                            | 7           |
| Amat et al 2018                    | *                                        | *                                   | *                                      | -                                                      | *                                              | *                     | *                     | *                                            | 7           |
| Liang et al 2017                   | *                                        | *                                   | *                                      | -                                                      | *                                              | *                     | *                     | *                                            | 7           |
| Kim et al 2016                     | *                                        | *                                   | *                                      | -                                                      | *                                              | *                     | *                     | *                                            | 7           |
| Cheng et al 2015                   | *                                        | *                                   | *                                      | *                                                      | *                                              | *                     | *                     | *                                            | 8           |
| Chaung et al 2014                  | *                                        | *                                   | *                                      | -                                                      | *                                              | *                     | *                     | *                                            | 7           |
| Diakos et al 2014                  | *                                        | *                                   | *                                      | -                                                      | *                                              | *                     | *                     | *                                            | 7           |
| Kwon et al 2014                    | *                                        | *                                   | *                                      | -                                                      | *                                              | *                     | *                     | *                                            | 7           |
| Lopez-Cortes et al 2014            | *                                        | *                                   | *                                      | *                                                      | **                                             | *                     | *                     | *                                            | 9           |
| Papadimitriou-Olivgeris et al 2014 | *                                        | *                                   | *                                      | -                                                      | *                                              | *                     | *                     | *                                            | 7           |
| Zarkotou et al 2011                | *                                        | *                                   | *                                      | *                                                      | *                                              | *                     | *                     | *                                            | 8           |
| Ku et al 2012                      | *                                        | *                                   | *                                      | -                                                      | *                                              | *                     | *                     | *                                            | 7           |

|                    |   |   |   |   |   |   |   |   |   |
|--------------------|---|---|---|---|---|---|---|---|---|
| Seok et al<br>2021 | * | * | - | * | * | * | * | * | 7 |
|--------------------|---|---|---|---|---|---|---|---|---|

<sup>1</sup> If the exposure data was obtained from prescription database or medical record, a point was assigned.

<sup>2</sup> If the study design is prospective study, a point was assigned.

<sup>3</sup> If adjusted for age, a point was assigned.

<sup>4</sup> If adjusted for any other additional factors, a point was assigned.

<sup>5</sup> If the completeness of follow-up was 80% or more, a point was assigned.

**Table S2: Quality of evidence for the included outcomes.**

| Outcome                                             | Number<br>of<br>studies | GRADE quality assessment |                                                               |                           |                          |                     |                                |
|-----------------------------------------------------|-------------------------|--------------------------|---------------------------------------------------------------|---------------------------|--------------------------|---------------------|--------------------------------|
|                                                     |                         | Risk of<br>bias          | Inconsistency                                                 | Indirectness              | Imprecision              | Publication<br>bias | Overall quality<br>of evidence |
| Tigecycline monotherapy versus colistin monotherapy |                         |                          |                                                               |                           |                          |                     |                                |
| Clinical response                                   | 3                       | Low                      | No series inconsistency                                       | No series<br>indirectness | No series<br>imprecision | Undetected          | ⊕⊕⊕⊕<br>High                   |
| Overall mortality                                   | 9                       | Low                      | No series inconsistency                                       | No series<br>indirectness | No series<br>imprecision | Undetected          | ⊕⊕⊕⊕<br>High                   |
| 30-day mortality                                    | 5                       | Low                      | No series inconsistency                                       | No series<br>indirectness | No series<br>imprecision | Undetected          | ⊕⊕⊕⊖<br>Moderate               |
| In-hospital<br>mortality                            | 6                       | Low                      | Series inconsistency<br>(due to significant<br>heterogeneity) | No series<br>indirectness | No series<br>imprecision | Undetected          | ⊕⊕⊕⊖<br>Moderate               |
| 7-day mortality                                     | 1                       | Low                      | No series inconsistency                                       | No series<br>indirectness | No series<br>imprecision | Undetected          | ⊕⊕⊕⊕<br>High                   |
| Recurrence of<br>infection                          | 1                       | Low                      | No series inconsistency                                       | No series<br>indirectness | No series<br>imprecision | Undetected          | ⊕⊕⊕⊕<br>High                   |

|                                                         |   |     |                                                               |                           |                          |            |                  |
|---------------------------------------------------------|---|-----|---------------------------------------------------------------|---------------------------|--------------------------|------------|------------------|
| Renal impairment                                        | 4 | Low | Series inconsistency<br>(due to significant<br>heterogeneity) | No series<br>indirectness | No series<br>imprecision | Undetected | ⊕⊕⊕⊖<br>Moderate |
| Hepatic enzymes<br>abnormalities                        | 2 | Low | No series inconsistency                                       | No series<br>indirectness | No series<br>imprecision | Undetected | ⊕⊕⊕⊕<br>High     |
| <b>Monotherapy versus combination therapy</b>           |   |     |                                                               |                           |                          |            |                  |
| Overall mortality                                       | 7 | Low | No series inconsistency                                       | No series<br>indirectness | No series<br>imprecision | Undetected | ⊕⊕⊕⊕<br>High     |
| 30-day mortality                                        | 6 | Low | No series inconsistency                                       | No series<br>indirectness | No series<br>imprecision | Detected   | ⊕⊕⊕⊖<br>Moderate |
| In-hospital<br>mortality                                | 3 | Low | Series inconsistency<br>(due to significant<br>heterogeneity) | No series<br>indirectness | No series<br>imprecision | Undetected | ⊕⊕⊕⊖<br>Moderate |
| 14-day mortality                                        | 2 | Low | No series inconsistency                                       | No series<br>indirectness | No series<br>imprecision | Undetected | ⊕⊕⊕⊕<br>High     |
| Renal impairment                                        | 1 | Low | No series inconsistency                                       | No series<br>indirectness | No series<br>imprecision | Undetected | ⊕⊕⊕⊕<br>High     |
| <b>Tigecycline combination and colistin combination</b> |   |     |                                                               |                           |                          |            |                  |
| Clinical response                                       | 2 | Low | No series inconsistency                                       | No series<br>indirectness | No series<br>imprecision | Undetected | ⊕⊕⊕⊕<br>High     |

|                               |   |     |                         |                        |                       |            |              |
|-------------------------------|---|-----|-------------------------|------------------------|-----------------------|------------|--------------|
| Overall mortality             | 7 | Low | No series inconsistency | No series indirectness | No series imprecision | Undetected | ⊕⊕⊕⊕<br>High |
| 30-day mortality              | 5 | Low | No series inconsistency | No series indirectness | No series imprecision | Undetected | ⊕⊕⊕⊕<br>High |
| In-hospital mortality         | 4 | Low | No series inconsistency | No series indirectness | No series imprecision | Undetected | ⊕⊕⊕⊕<br>High |
| 7-day mortality               | 1 | Low | No series inconsistency | No series indirectness | No series imprecision | Undetected | ⊕⊕⊕⊕<br>High |
| 14-day mortality              | 1 | Low | No series inconsistency | No series indirectness | No series imprecision | Undetected | ⊕⊕⊕⊕<br>High |
| Recurrence of infection       | 1 | Low | No series inconsistency | No series indirectness | No series imprecision | Undetected | ⊕⊕⊕⊕<br>High |
| Renal impairment              | 3 | Low | No series inconsistency | No series indirectness | No series imprecision | Undetected | ⊕⊕⊕⊕<br>High |
| Hepatic enzymes abnormalities | 1 | Low | No series inconsistency | No series indirectness | No series imprecision | Undetected | ⊕⊕⊕⊕<br>High |

**Table S3: PRISMA Checklist.**

| Section and Topic             | Item # | Checklist item                                                                                                                                                                                                                                                                                       |
|-------------------------------|--------|------------------------------------------------------------------------------------------------------------------------------------------------------------------------------------------------------------------------------------------------------------------------------------------------------|
| <b>TITLE</b>                  |        |                                                                                                                                                                                                                                                                                                      |
| Title                         | 1      | Identify the report as a systematic review.                                                                                                                                                                                                                                                          |
| <b>ABSTRACT</b>               |        |                                                                                                                                                                                                                                                                                                      |
| Abstract                      | 2      | See the PRISMA 2020 for Abstracts checklist.                                                                                                                                                                                                                                                         |
| <b>INTRODUCTION</b>           |        |                                                                                                                                                                                                                                                                                                      |
| Rationale                     | 3      | Describe the rationale for the review in the context of existing knowledge.                                                                                                                                                                                                                          |
| Objectives                    | 4      | Provide an explicit statement of the objective(s) or question(s) the review addresses.                                                                                                                                                                                                               |
| <b>METHODS</b>                |        |                                                                                                                                                                                                                                                                                                      |
| Eligibility criteria          | 5      | Specify the inclusion and exclusion criteria for the review and how studies were grouped for the syntheses.                                                                                                                                                                                          |
| Information sources           | 6      | Specify all databases, registers, websites, organisations, reference lists and other sources searched or consulted to identify studies. Specify the date when each source was last searched or consulted.                                                                                            |
| Search strategy               | 7      | Present the full search strategies for all databases, registers and websites, including any filters and limits used.                                                                                                                                                                                 |
| Selection process             | 8      | Specify the methods used to decide whether a study met the inclusion criteria of the review, including how many reviewers screened each record and each report retrieved, whether they worked independently, and if applicable, details of automation tools used in the process.                     |
| Data collection process       | 9      | Specify the methods used to collect data from reports, including how many reviewers collected data from each report, whether they worked independently, any processes for obtaining or confirming data from study investigators, and if applicable, details of automation tools used in the process. |
| Data items                    | 10a    | List and define all outcomes for which data were sought. Specify whether all results that were compatible with each outcome domain in each study were sought (e.g. for all measures, time points, analyses), and if not, the methods used to decide which results to collect.                        |
|                               | 10b    | List and define all other variables for which data were sought (e.g. participant and intervention characteristics, funding sources). Describe any assumptions made about any missing or unclear information.                                                                                         |
| Study risk of bias assessment | 11     | Specify the methods used to assess risk of bias in the included studies, including details of the tool(s) used, how many reviewers assessed each study and whether they worked independently, and if applicable, details of automation tools used in the process.                                    |
| Effect measures               | 12     | Specify for each outcome the effect measure(s) (e.g. risk ratio, mean difference) used in the synthesis or presentation of results.                                                                                                                                                                  |
| Synthesis methods             | 13a    | Describe the processes used to decide which studies were eligible for each synthesis (e.g. tabulating the study intervention characteristics and comparing against the planned groups for each synthesis (item #5)).                                                                                 |
|                               | 13b    | Describe any methods required to prepare the data for presentation or synthesis, such as handling of missing summary statistics, or data conversions.                                                                                                                                                |
|                               | 13c    | Describe any methods used to tabulate or visually display results of individual studies and syntheses.                                                                                                                                                                                               |

|                           |     |                                                                                                                                                                                                                                                             |
|---------------------------|-----|-------------------------------------------------------------------------------------------------------------------------------------------------------------------------------------------------------------------------------------------------------------|
|                           | 13d | Describe any methods used to synthesize results and provide a rationale for the choice(s). If meta-analysis was performed, describe the model(s), method(s) to identify the presence and extent of statistical heterogeneity, and software package(s) used. |
|                           | 13e | Describe any methods used to explore possible causes of heterogeneity among study results (e.g. subgroup analysis, meta-regression).                                                                                                                        |
|                           | 13f | Describe any sensitivity analyses conducted to assess robustness of the synthesized results.                                                                                                                                                                |
| Reporting bias assessment | 14  | Describe any methods used to assess risk of bias due to missing results in a synthesis (arising from reporting biases).                                                                                                                                     |
| Certainty assessment      | 15  | Describe any methods used to assess certainty (or confidence) in the body of evidence for an outcome.                                                                                                                                                       |

**Table S4: Search strategies**

|                                                                                                                                                                                                                                                                                                                                                                                                      |
|------------------------------------------------------------------------------------------------------------------------------------------------------------------------------------------------------------------------------------------------------------------------------------------------------------------------------------------------------------------------------------------------------|
| <b>Database: Medline &lt;1950 to 2021 May 15&gt;</b>                                                                                                                                                                                                                                                                                                                                                 |
| Search Strategy:                                                                                                                                                                                                                                                                                                                                                                                     |
| 1 tigecycline or tygacil or glycylicycline or TGC, or 'GAR-936' or tigecycline monotherapy, tigecycline combination.mp. (4583)                                                                                                                                                                                                                                                                       |
| 2 Colistin or colistin monotherapy or colistin combination.mp. (2881)                                                                                                                                                                                                                                                                                                                                |
| 3 1 and 2 (903)                                                                                                                                                                                                                                                                                                                                                                                      |
| 4 Bacteraemia or bacteremia or bloodstream infection or sepsis or septicaemia/ (57014)                                                                                                                                                                                                                                                                                                               |
| 5 Multidrug-resistant or MDR or carbapenem-resistant or extensively drug resistant or XDR or carbapenem combination therapy/ (55730)                                                                                                                                                                                                                                                                 |
| 6 Acinetobacter baumannii or Klebsiella pneumoniae or Pseudomonas aeruginosa or carbapenemase producing or Enterobacteriaceae or carbapenem-resistant Enterobacteriaceae, or CRE (17414)                                                                                                                                                                                                             |
| 7 3 and (4 or 5 or 6) (30195)                                                                                                                                                                                                                                                                                                                                                                        |
| 8 observational*.tw. (229)                                                                                                                                                                                                                                                                                                                                                                           |
| 9 Comparative study*.tw. (1404)                                                                                                                                                                                                                                                                                                                                                                      |
| 10 clinical trial*.tw. (198)                                                                                                                                                                                                                                                                                                                                                                         |
| 11 randomized controlled trial/ (153)                                                                                                                                                                                                                                                                                                                                                                |
| 12 controlled clinical trial*.tw. (21)                                                                                                                                                                                                                                                                                                                                                               |
| 13 or/7-12 (1870)                                                                                                                                                                                                                                                                                                                                                                                    |
| 14 7 and 13 (1455)                                                                                                                                                                                                                                                                                                                                                                                   |
| 15 limit 14 to (Human and English language) (1373)                                                                                                                                                                                                                                                                                                                                                   |
| <b>Database: EBM Reviews - Cochrane Central Register of Controlled Trials &lt;April 2020&gt;</b>                                                                                                                                                                                                                                                                                                     |
| Search Strategy:                                                                                                                                                                                                                                                                                                                                                                                     |
| 1 tigecycline or tygacil or glycylicycline or TGC, or 'GAR-936' or tigecycline monotherapy, tigecycline combination (title abstract keyword) (238)                                                                                                                                                                                                                                                   |
| 2 Colistin or colistin monotherapy or colistin combination (title abstract keyword) (462)                                                                                                                                                                                                                                                                                                            |
| 3 1 and 2 (35)                                                                                                                                                                                                                                                                                                                                                                                       |
| 4 Bacteraemia or bacteremia or bloodstream infection or sepsis or septicaemia or Multidrug-resistant or MDR or carbapenem-resistant or extensively drug resistant or XDR or carbapenem combination therapy or Acinetobacter baumannii or Klebsiella pneumoniae or Pseudomonas aeruginosa or carbapenemase producing or Enterobacteriaceae or carbapenem-resistant Enterobacteriaceae, or CRE (18189) |
| 5 3 and 4 (32)                                                                                                                                                                                                                                                                                                                                                                                       |
| <b>Database: Embase &lt;1974 to May 15, 2021&gt;</b>                                                                                                                                                                                                                                                                                                                                                 |
| Search Strategy:                                                                                                                                                                                                                                                                                                                                                                                     |



|                                                                                                                                                                                                                                                                                                                                                                                                                |
|----------------------------------------------------------------------------------------------------------------------------------------------------------------------------------------------------------------------------------------------------------------------------------------------------------------------------------------------------------------------------------------------------------------|
| 1 tigecycline or tygacil or glycylcycline or TGC, or 'GAR-936' or tigecycline monotherapy, tigecycline combination.mp. (5342)                                                                                                                                                                                                                                                                                  |
| 2 Colistin or colistin monotherapy or colistin combination.mp. (3468)                                                                                                                                                                                                                                                                                                                                          |
| 3 1 and 2 (843)                                                                                                                                                                                                                                                                                                                                                                                                |
| 4 Bacteraemia or bacteremia or bloodstream infection or sepsis or septicaemia/ (62865)                                                                                                                                                                                                                                                                                                                         |
| 5 Multidrug-resistant or MDR or carbapenem-resistant or extensively drug resistant or XDR or carbapenem combination therapy/ (69521)                                                                                                                                                                                                                                                                           |
| 6 Acinetobacter baumannii or Klebsiella pneumoniae or Pseudomonas aeruginosa or carbapenemase producing or Enterobacteriaceae or carbapenem-resistant Enterobacteriaceae, or CRE (21535)                                                                                                                                                                                                                       |
| 7 3 and 4 or 5 or 6 (41532)                                                                                                                                                                                                                                                                                                                                                                                    |
| 8 observational*.tw. (351)                                                                                                                                                                                                                                                                                                                                                                                     |
| 9 Comparative study*.tw. (1605)                                                                                                                                                                                                                                                                                                                                                                                |
| 10 clinical trial*.tw. (262)                                                                                                                                                                                                                                                                                                                                                                                   |
| 11 randomized controlled trial/ (167)                                                                                                                                                                                                                                                                                                                                                                          |
| 12 controlled clinical trial*.tw. (46)                                                                                                                                                                                                                                                                                                                                                                         |
| 13 or/7-12 (2154)                                                                                                                                                                                                                                                                                                                                                                                              |
| 14 7 and 13 (1563)                                                                                                                                                                                                                                                                                                                                                                                             |
| 15 limit 14 to (Human and English language) (1482)                                                                                                                                                                                                                                                                                                                                                             |
| <b>Grey literature sources: clinicaltrial.gov, and Google Scholar &lt; May 15, 2021&gt;</b>                                                                                                                                                                                                                                                                                                                    |
| Search Strategy:                                                                                                                                                                                                                                                                                                                                                                                               |
| All possible combinations among search terms from each of the following domains were manually created and searched. Only a single term from each domain was used in any combination.                                                                                                                                                                                                                           |
| - Drug 1 domain: tigecycline or tygacil or glycylcycline or TGC, or 'GAR-936', tigecycline monotherapy, tigecycline combination.                                                                                                                                                                                                                                                                               |
| - Drug 2 domain: colistin, colistin monotherapy, colistin combination                                                                                                                                                                                                                                                                                                                                          |
| - Condition domain: Bacteremia or bacteremia or bloodstream infection or sepsis or septicaemia or Multidrug-resistant or MDR or carbapenem-resistant or extensively drug resistant or XDR or carbapenem combination therapy or Acinetobacter baumannii or Klebsiella pneumoniae or Pseudomonas aeruginosa or carbapenemase producing or Enterobacteriaceae or carbapenem-resistant Enterobacteriaceae, or CRE. |
| Grey literature sources: clinicaltrial.gov, and Google Scholar < May 15, 2021>                                                                                                                                                                                                                                                                                                                                 |
| Search Strategy:                                                                                                                                                                                                                                                                                                                                                                                               |
| All possible combinations among search terms from each of the following domains were manually created and searched. Only a single term from each domain was used in any combination.                                                                                                                                                                                                                           |

|                                                                                                                                                                                                                                                                                                                                                                                                                |
|----------------------------------------------------------------------------------------------------------------------------------------------------------------------------------------------------------------------------------------------------------------------------------------------------------------------------------------------------------------------------------------------------------------|
| - Drug 1 domain: tigecycline or tygacil or glycylicycline or TGC, or 'GAR-936', tigecycline monotherapy, tigecycline combination.                                                                                                                                                                                                                                                                              |
| - Drug 2 domain: colistin, colistin monotherapy, colistin combination                                                                                                                                                                                                                                                                                                                                          |
| - Condition domain: Bacteremia or bacteremia or bloodstream infection or sepsis or septicaemia or Multidrug-resistant or MDR or carbapenem-resistant or extensively drug resistant or XDR or carbapenem combination therapy or Acinetobacter baumannii or Klebsiella pneumoniae or Pseudomonas aeruginosa or carbapenemase producing or Enterobacteriaceae or carbapenem-resistant Enterobacteriaceae, or CRE. |

Supplementary Figure Materials S1. Additional base case analysis results

Figure S1.1. Funnel plot for overall mortality: colistin versus tigecycline monotherapies

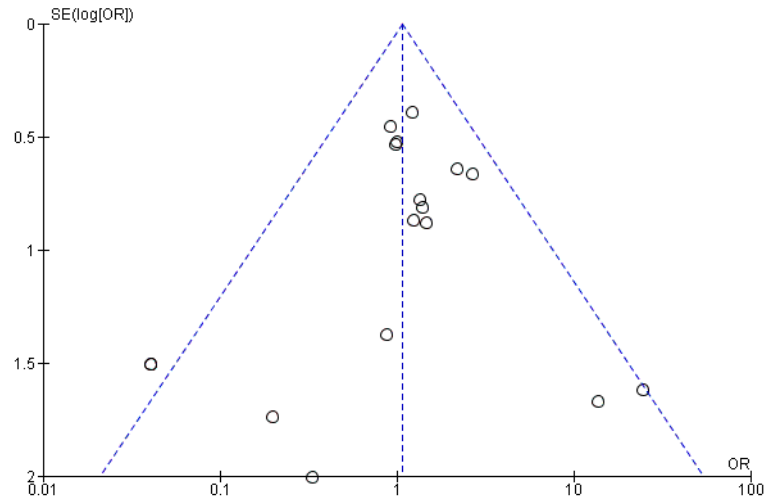

Figure S1.2. Sensitivity analysis for in-hospital mortality: colistin versus tigecycline monotherapies

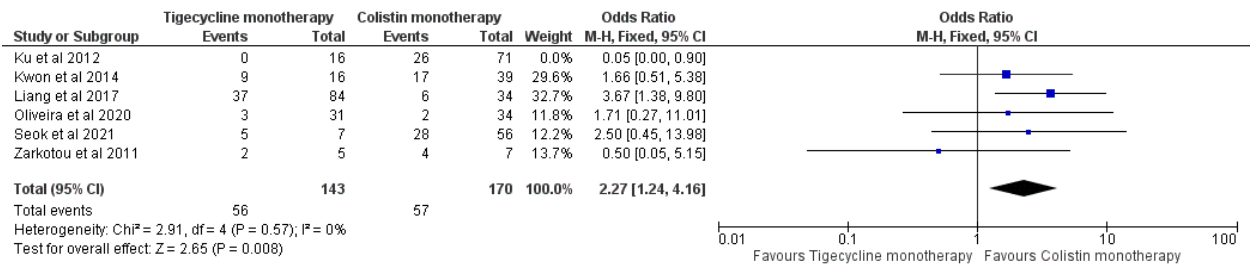

Figure S1.3. Recurrence: colistin versus tigecycline monotherapies

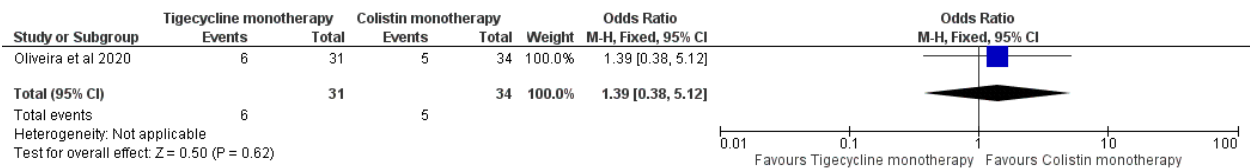

Figure S1.4. 7-day mortality: colistin versus tigecycline monotherapies

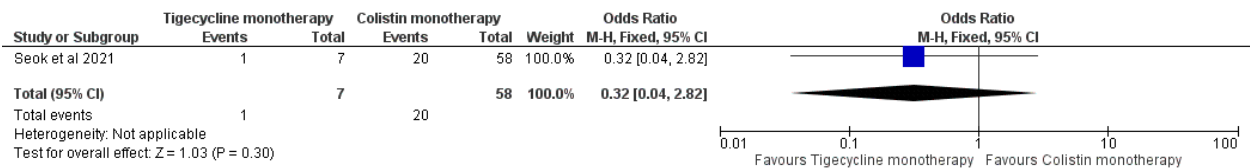

Figure S1.5. Renal impairment: colistin versus tigecycline monotherapies

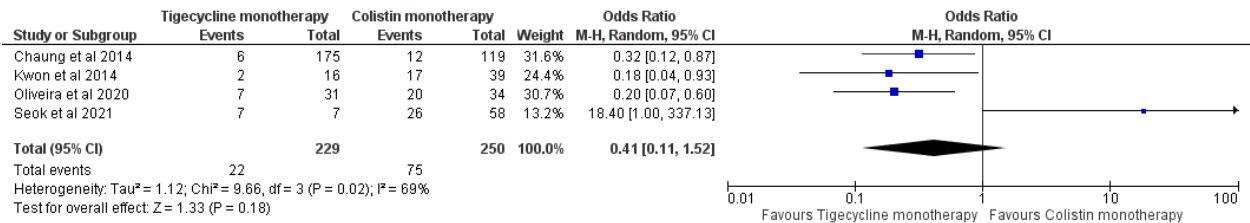

Figure S1.6. Sensitivity analysis for renal impairment: colistin versus tigecycline monotherapies

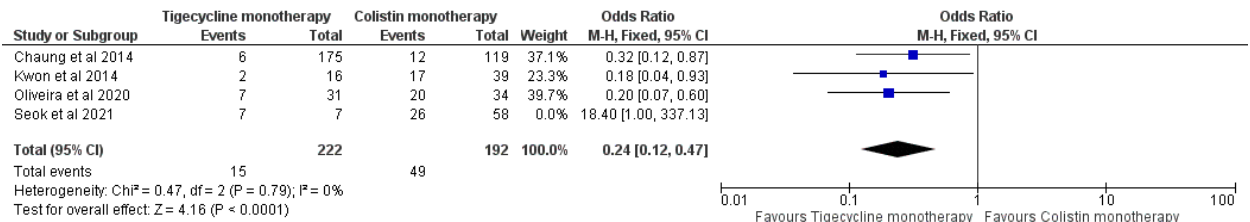

Figure S1.7. Liver enzymes abnormalities: colistin versus tigecycline monotherapies

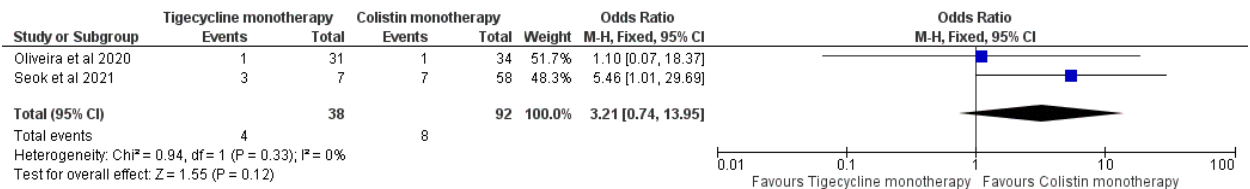

Figure S1.8. Funnel plot for overall mortality: monotherapy versus combination

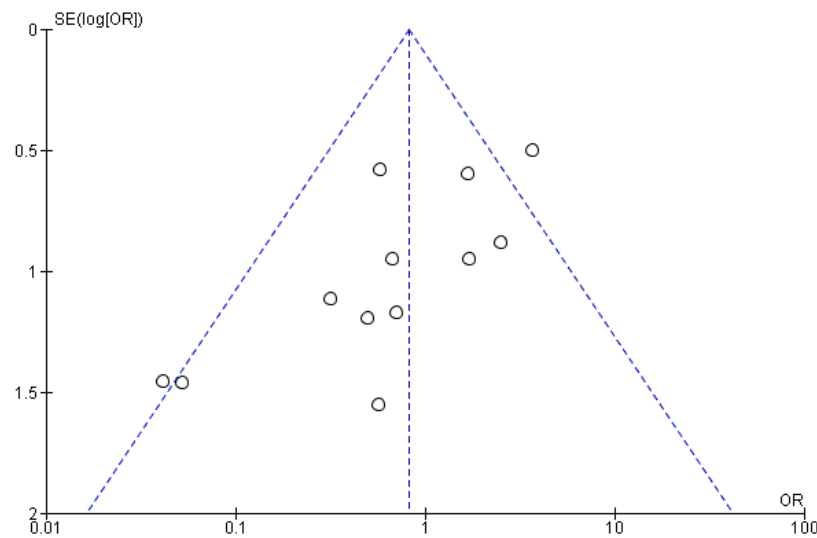

Figure S1.9. Funnel plot for 30-day mortality: monotherapy versus combination

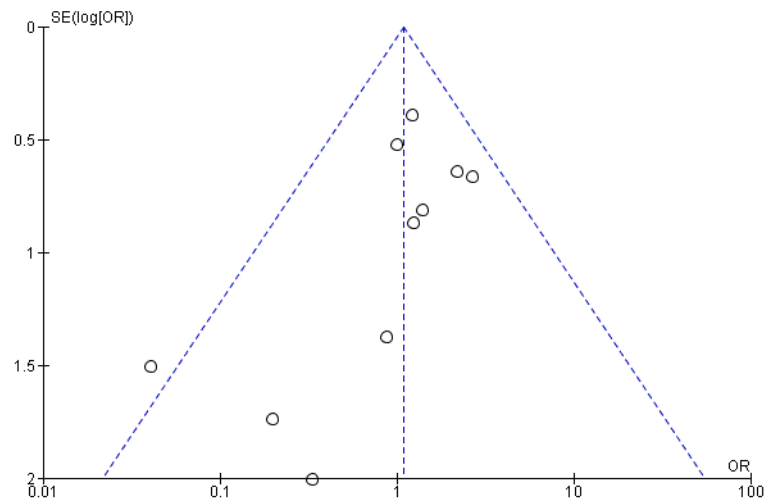

Figure S1.10. Sensitivity analysis for in-hospital mortality: monotherapy versus combination

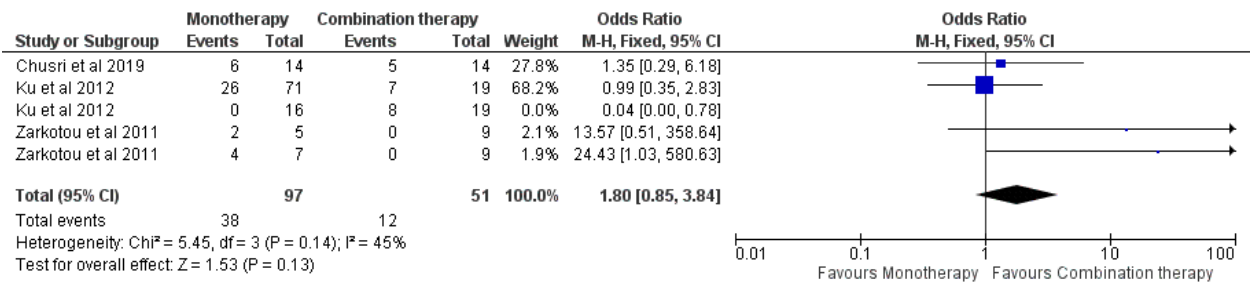

Figure S1.11. 14-day mortality: monotherapy versus combination

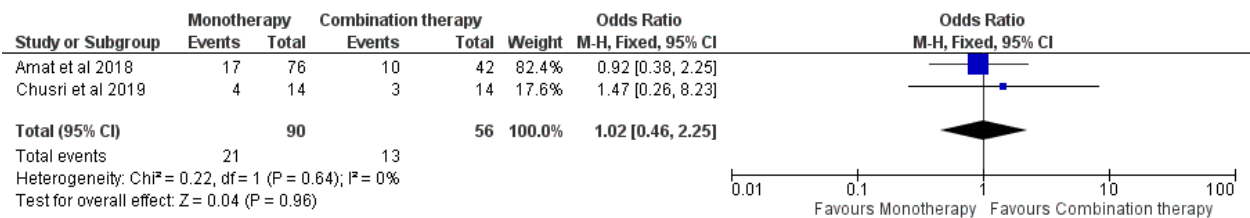

Figure S1.12. Renal impairment: monotherapy versus combination

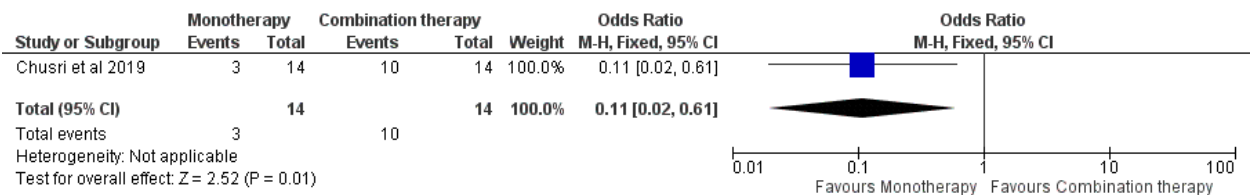

Figure S1.13. Funnel plot for overall mortality: colistin versus tigecycline combinations

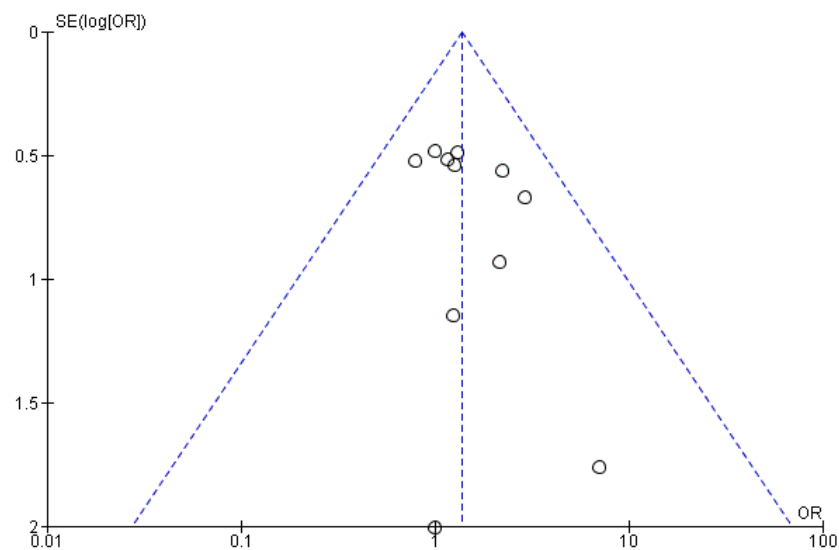

Figure S1.14. Recurrence: colistin versus tigecycline combinations

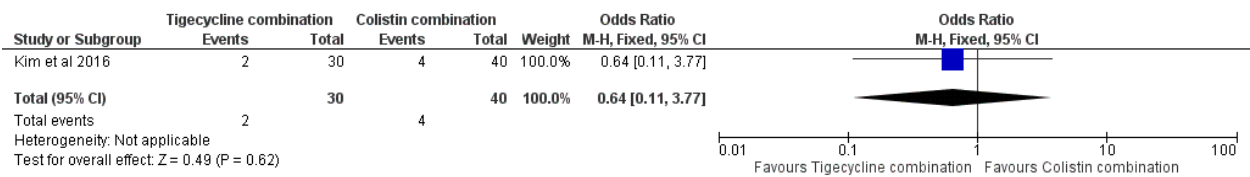

Figure S1.15. 7-day mortality: colistin versus tigecycline combinations

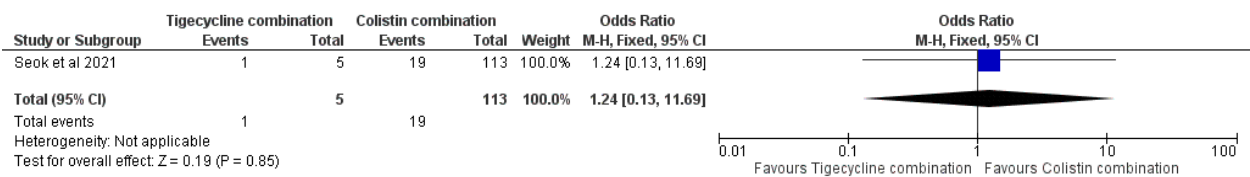

Figure S1.16. 14-day mortality: colistin versus tigecycline combinations

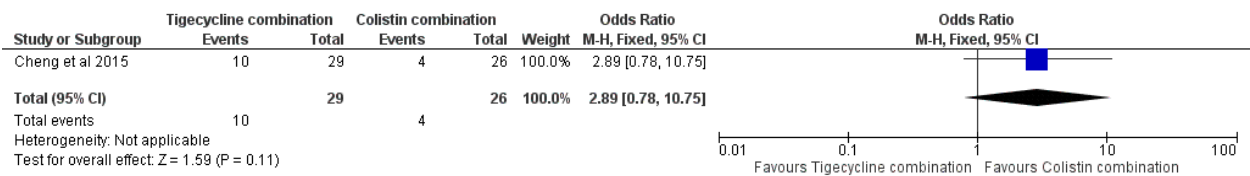

Figure S1.17. Renal impairment: colistin versus tigecycline combinations

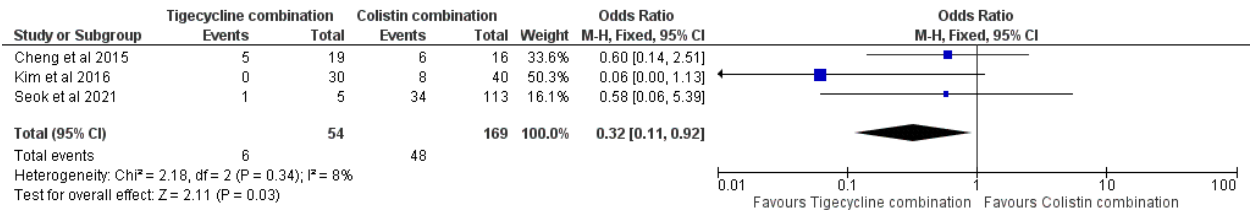

Figure S1.18. Liver enzymes abnormalities: colistin versus tigecycline combinations

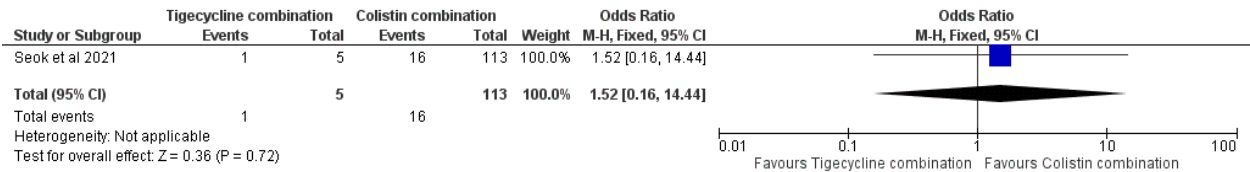

## Supplementary Materials S2. Subgroup analysis results

Figure S2.1. Subgroup analysis for clinical cure: colistin versus tigecycline monotherapies

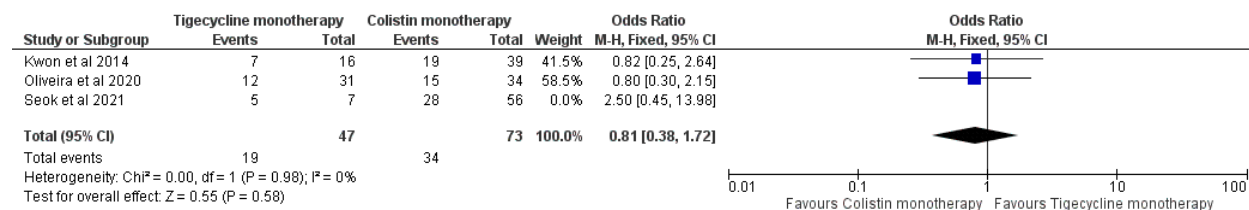

Figure S2.2. Subgroup analysis for 28-day and 30-day mortalities: colistin versus tigecycline monotherapies

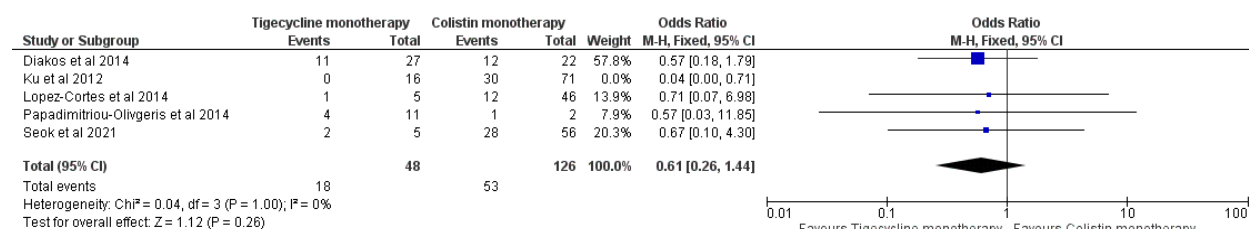

Figure S2.3. Subgroup analysis for in-hospital mortality, excluding ICU and infection-caused mortality: colistin versus tigecycline monotherapies

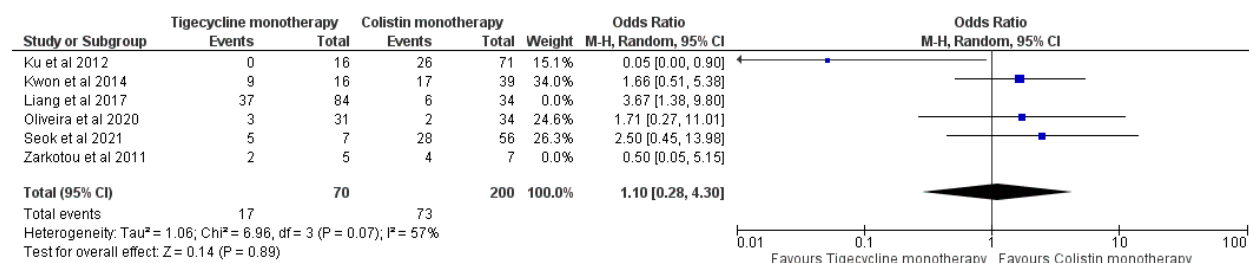

Figure S2.4. Subgroup analysis for nephrotoxicity: colistin versus tigecycline monotherapies

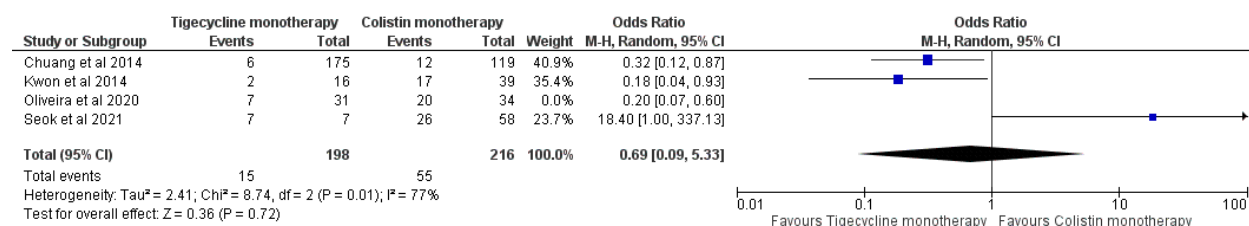



Figure S2.5. Subgroup analysis for 30-day mortality with the colistin monotherapy only: monotherapy versus combination

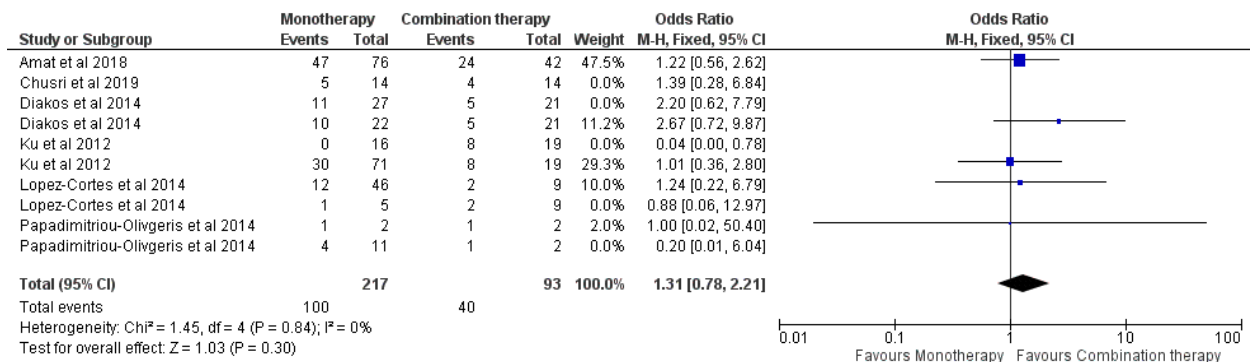

Figure S2.6. Subgroup analysis for 30-day mortality with the tigecycline monotherapy only: monotherapy versus combination

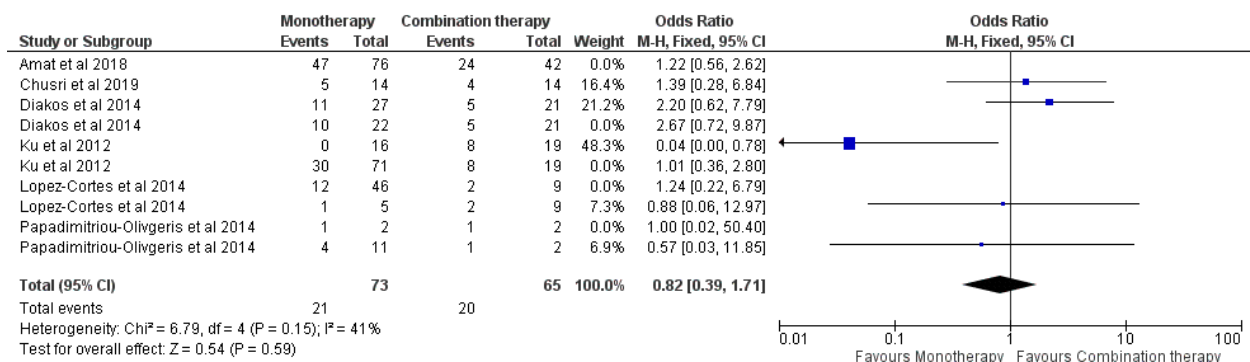

Figure S2.7. Subgroup analysis for 30-day mortality, excluding 3-month mortality: monotherapy versus combination

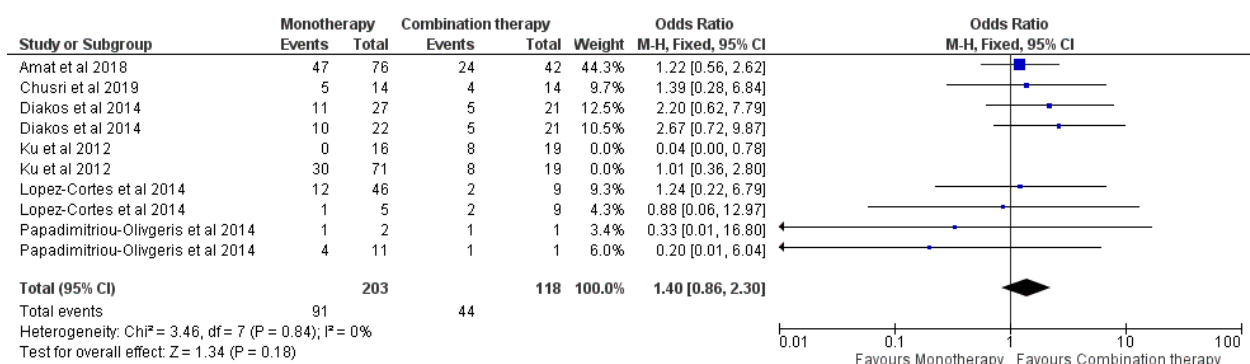

Figure S2.8. Subgroup analysis for in-hospital mortality with the colistin monotherapy only: monotherapy versus combination

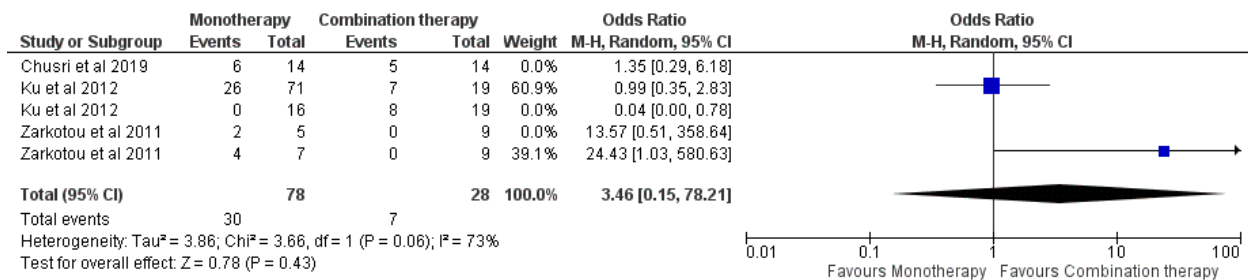

Figure S2.9. Subgroup analysis for in-hospital mortality with the tigecycline monotherapy only: monotherapy versus combination

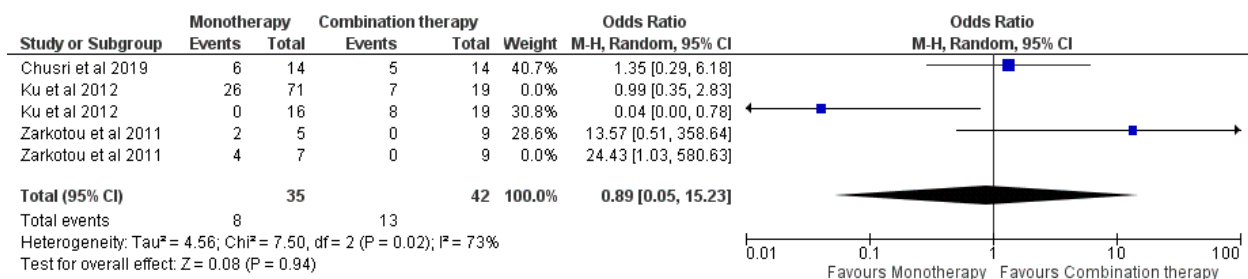

Figure S2.10. Subgroup analysis for in-hospital mortality, excluding infection-caused mortality: monotherapy versus combination

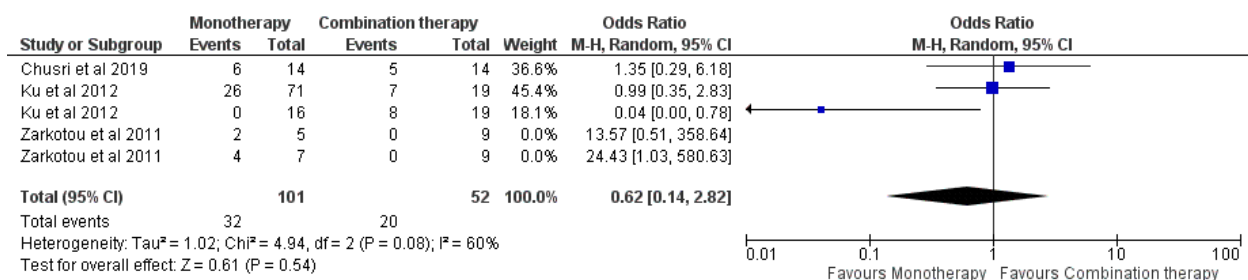

Figure S2.11. Subgroup analysis for in-hospital mortality, excluding ICU mortality: colistin versus tigecycline combinations

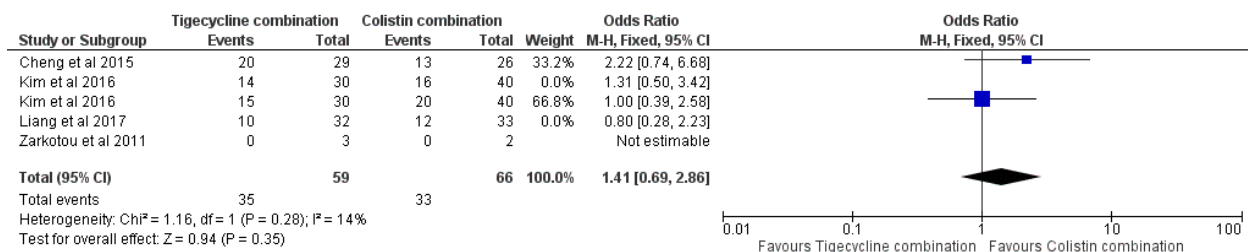

Supplement: s1 [file s1]
